# Supplementary material
Source: publisher site journal article supplement (https://www.degruyterbrill.com/publication/journal_key/DSLL/downloadAsset/DSLL_CfP%20Call%20for%20Abstracts%20DSLL%20Special%20Issue%20AI%20Literacies%20in%20the%20the%20Language%20Classrooms.pdf)
Supplement: Supplementary file 1 [file DSLL_CfP%20Call%20for%20Abstracts%20DSLL%20Special%20Issue%20AI%20Literacies%20in%20the%20the%20Language%20Classrooms.pdf]

# Call for Abstracts

## Defining, Measuring, and Promoting Generative AI Literacies in the Language Classrooms

This *Digital Studies in Language and Literature* Special Issue invites work that explores how GenAI literacy is defined, measured, and promoted within language and literature classrooms. We seek contributions that move beyond speculative frameworks to offer empirical insights. This includes research that validates instruments for measuring GenAI literacy, explores interventions targeting GenAI literacy, and investigates how GenAI develops overtime in learners. This may also include research that explores the interaction between prompting strategies, general GenAI knowledge, and language proficiency/development. Finally, we are particularly interested in intervention that promote both language learning and GenAI literacy simultaneously.

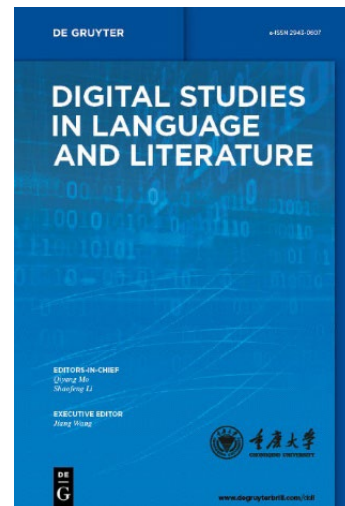

### Guest editors

Frederick Poole (Michigan State University) – [poolefre@msu.edu](mailto:poolefre@msu.edu)

Hyun-bin Hwang (Gyeongsang National University) – [indigohyunbin@gmail.com](mailto:indigohyunbin@gmail.com)

### Special issue information

This DSLL Special Issue is calling for submissions on the theme “Defining, Measuring, and Promoting Generative AI Literacies in the Language Classrooms”. We seek empirical, theoretical, and practice-informed studies that examine how GenAI literacy is measured and promoted through in-class interventions.

Submissions may address a range of contexts and topics, including:

- Defining and operationalizing GenAI literacy in language and literature classrooms
- Classroom-based interventions that promote GenAI literacy and language learning
- Effect of GenAI prompting on students’ metalinguistic awareness or language use
- Empirical validation of instruments measuring GenAI literacy development
- Longitudinal analysis of student work to trace GenAI literacy growth
- Instructional strategies for teaching responsible and effective GenAI use
- Intersections of GenAI literacy with digital, critical, or transliteracy frameworks

- Ethical considerations in teaching with GenAI in linguistically diverse contexts

### Submission instructions

Proposed abstracts should be submitted to the guest editor for initial consideration. Please send a 500-word abstract describing previously unpublished empirical (not conceptual) work. Do not include author name(s) in the abstract document. In a separate document, include each author's name, affiliation, contact information, and a 50-word biographical statement.

If abstracts are accepted, authors will be invited to submit full-length articles for possible inclusion. All submissions will undergo double-blind peer review.

### Timeline

- |                                        |                         |
|----------------------------------------|-------------------------|
| • Abstracts due to guest editor:       | <b>25 October 2025</b>  |
| • Short-listed abstracts announced:    | <b>15 November 2025</b> |
| • Full manuscript submission deadline: | <b>15 March 2026</b>    |
| • Peer review completion:              | <b>15 May 2026</b>      |
| • Final revisions due:                 | <b>15 July 2026</b>     |

Issue publication is scheduled for **August 2026**

### General information on *Digital Studies in Language and Literature*

*Digital Studies in Language and Literature* (DSLL) is a peer-reviewed, interdisciplinary publication dedicated to advancing research on the intersection of digital technology, language, and literature.

Accepted articles will be published via fully sponsored Open Access through a [Creative Commons Attribution \(CC-BY-4.0\) License](#), so your research will be freely available for all to read and download.

Please visit the [DSLL Homepage](#) for further information.
